# Supplementary material for: α-Synuclein Fibrils as Penrose Machines: A Chameleon in the Gear
Source: MDPI journal article supplement (doi:10.3390/biom12040494), 2022-03-24
Supplement: s1 [file s1]

Supplementary Data:

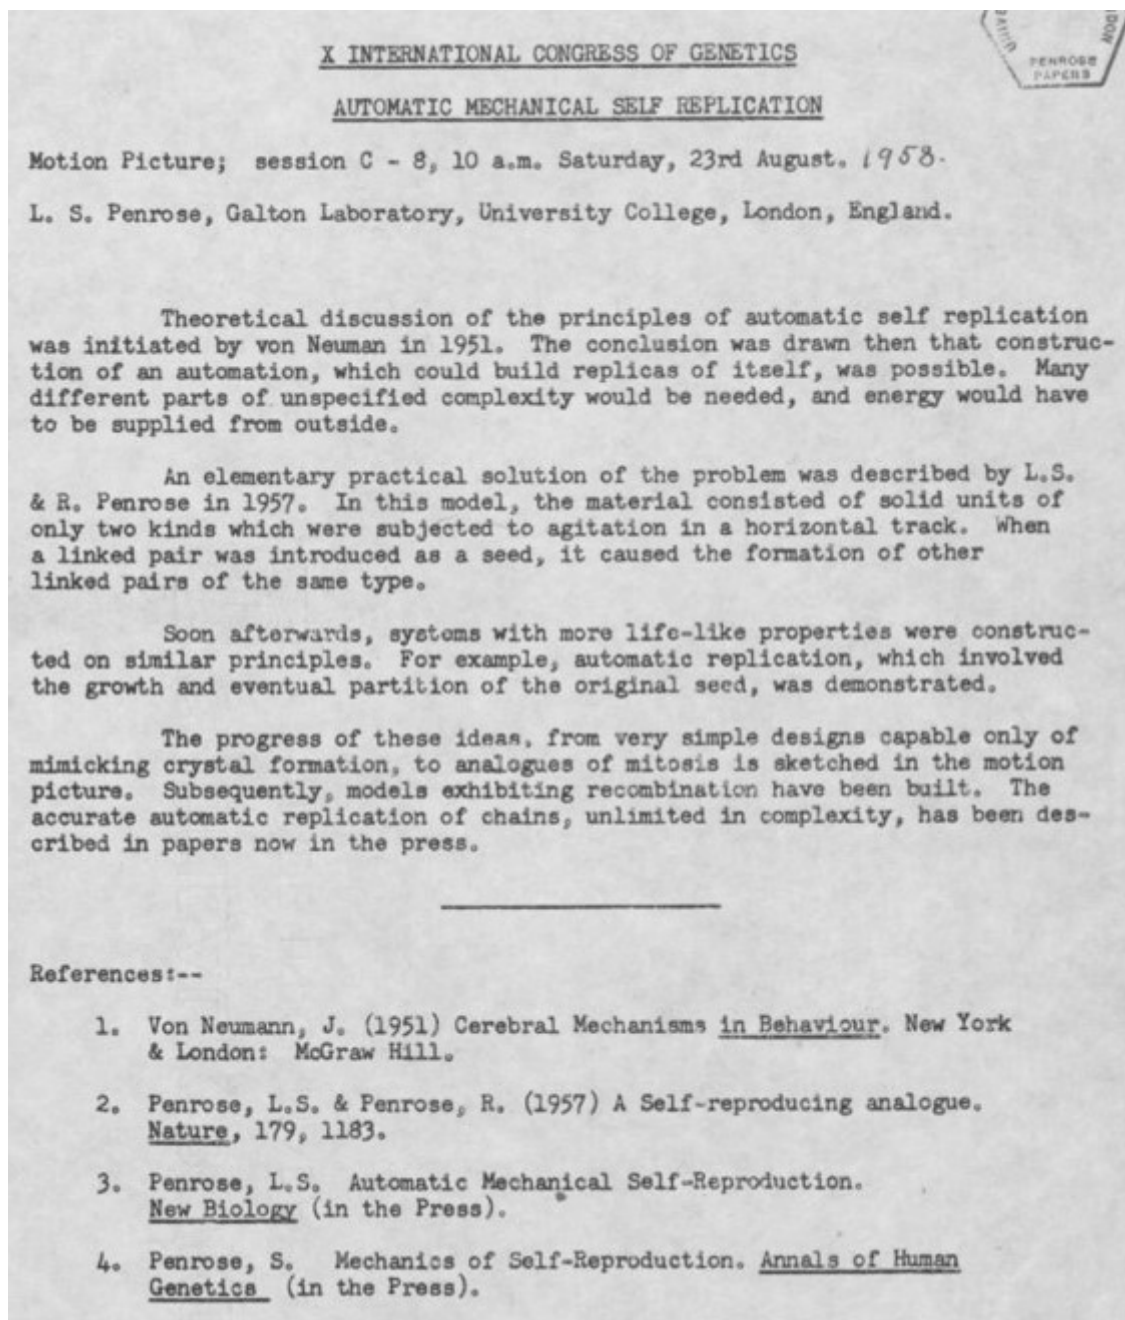

Supplementary Figure S1: Abstract sent by L.S. Penrose to participate to the 10<sup>th</sup> International Congress of Genetics, August 20-27 1958, McGill University, Montreal
